# Supplementary material for: Structural and physico-chemical characterization of a dirhamnolipid biosurfactant purified from Pseudomonas aeruginosa: application of crude biosurfactant in enhanced oil recovery
Source: Royal Society of Chemistry journal article supplement (doi:10.1039/c6ra11979d), 2016-01-01
Supplement: c6ra11979d1.pdf [file c6ra11979d1.pdf]

### Supplementary Figure Legends

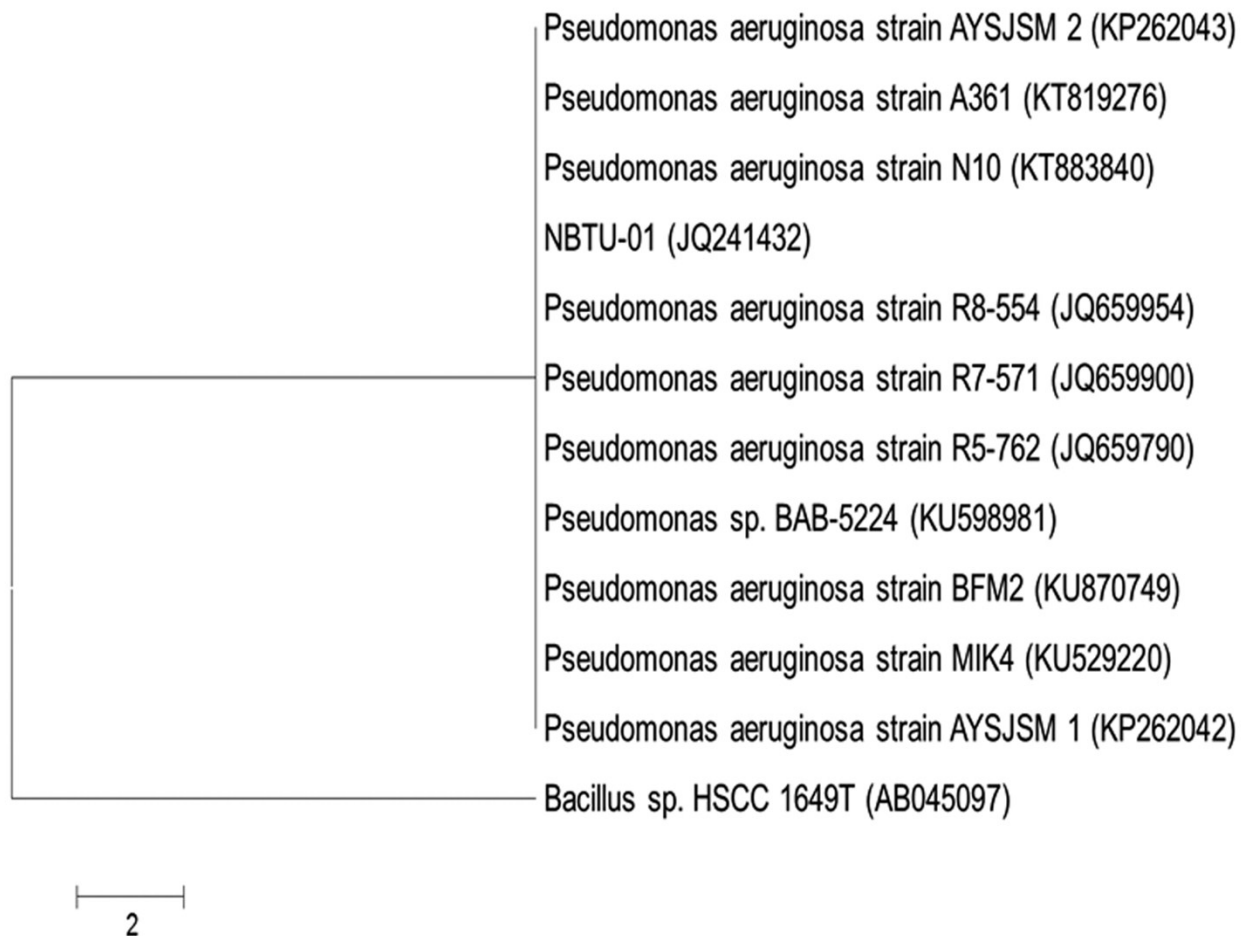

**Fig. S1.** Phylogenetic relationships of strain NBTU-01 and other closely related *Pseudomonas* species based on 16S rDNA sequencing. All positions containing gaps and missing data were eliminated from the dataset (complete deletion option). There were a total of 683 positions in the final dataset. The tree was generated using the neighbor-joining method and the sequence from *Bacillus* sp. HSCC 1649 T (Accession no. AB045097) was considered as out-group. The stability of tree obtained from the above cluster analyses was assessed by using BOOTSTRAP program in sets of 1,000 resamplings (MEGA 6) and percentage values are given at the nodes.

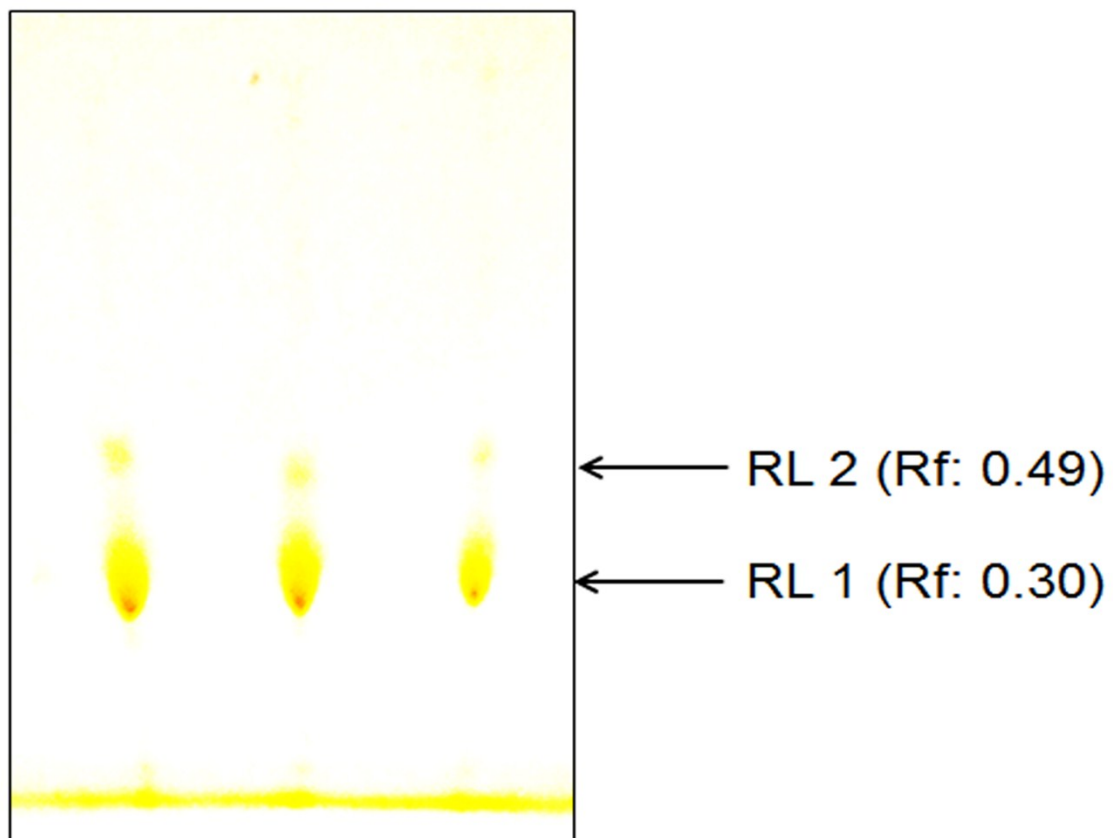

**50:50 (Chloroform: methanol, (v/v) eluted fraction)**

**Fig. S2.** TLC analysis of chloroform: methanol (50:50 v/v) eluted biosurfactant fraction from Silica gel G column. The colour in TLC plate was developed by iodine vapor staining method. The analysis was performed in triplicate to assure the reproducibility. RL1 and RL2 represent dirhamnolipid and monorhamnolipid, respectively.

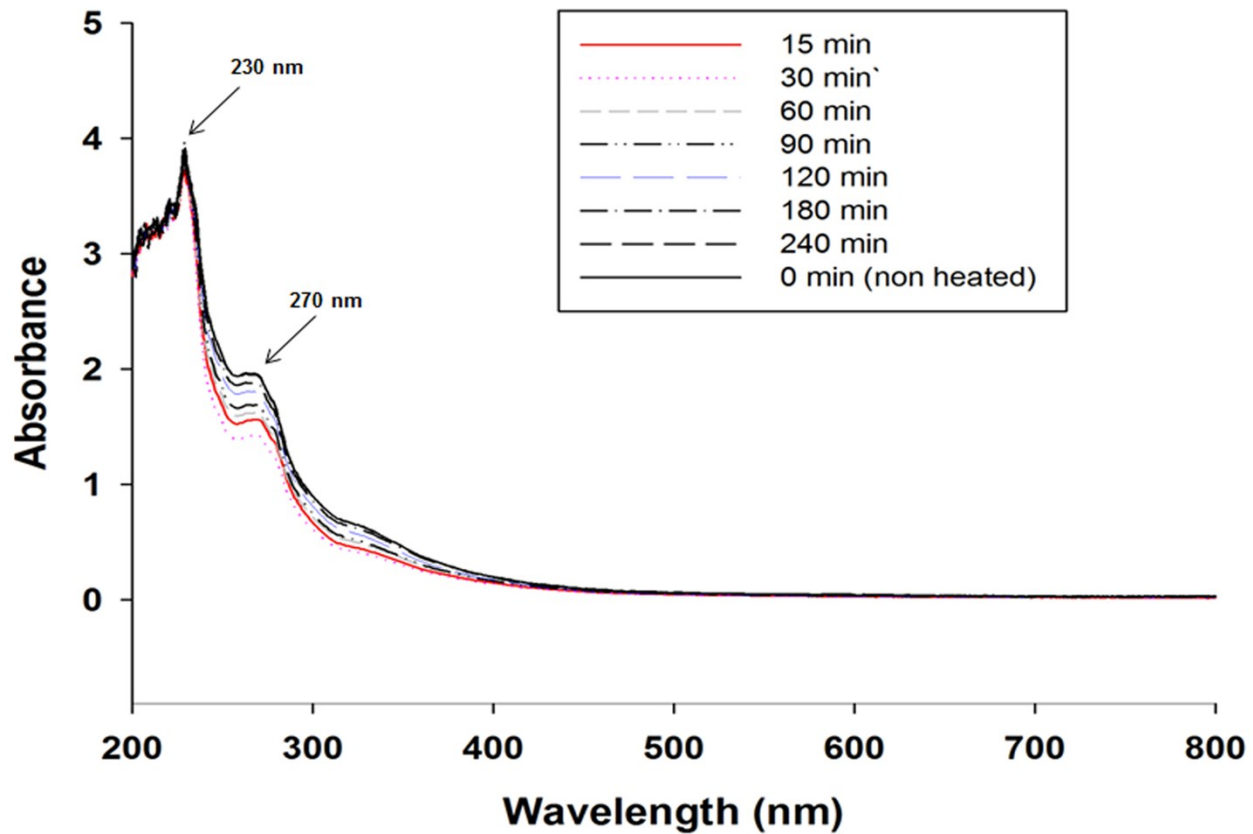

**Fig. S3.** UV-Vis spectral analysis of non-heated (control) and heated rhamnolipid biosurfactant (100  $\mu\text{g/ml}$ ) at 100  $^{\circ}\text{C}$  for different time intervals. The data represents average of three scans.

## Supplementary Tables

**Table S1.** Yield of bacterial dry biomass, protein content and surface tension of culture medium supplemented with 1% (v/v) glycerol or hexadecane in M9 medium post 96 h of inoculation at 37 °C. Values are mean  $\pm$  S.D. of three determinations.

| Bacterial Isolates | Glycerol                         |                                       |                                      | Hexadecane                       |                                       |                                      |
|--------------------|----------------------------------|---------------------------------------|--------------------------------------|----------------------------------|---------------------------------------|--------------------------------------|
|                    | Dry biomass (g l <sup>-1</sup> ) | Protein content (mg l <sup>-1</sup> ) | Surface tension (mNm <sup>-1</sup> ) | Dry biomass (g l <sup>-1</sup> ) | Protein content (mg l <sup>-1</sup> ) | Surface tension (mNm <sup>-1</sup> ) |
| NBTU-01            | 3.4 $\pm$ 0.1                    | 664.0 $\pm$ 2.0                       | 31.5 $\pm$ 0.29*                     | 3.1 $\pm$ 0.3                    | 38.4 $\pm$ 0.2                        | 34.2 $\pm$ 0.4*                      |
| G#85               | 0.25 $\pm$ 0.01                  | 3.2 $\pm$ 0.3                         | 58.9 $\pm$ 0.2                       | 1.2 $\pm$ 0.01                   | 8.8 $\pm$ 0.23                        | 38.0 $\pm$ 0.6                       |
| G#207              | 0.5 $\pm$ 0.08                   | 0.2 $\pm$ 0.003                       | 64.1 $\pm$ 0.8                       | 3.5 $\pm$ 0.2                    | 15.2 $\pm$ 0.9                        | 53.3 $\pm$ 0.2                       |
| G#191              | 0.55 $\pm$ 0.1                   | 0.6 $\pm$ 0.01                        | 61.1 $\pm$ 0.9                       | 2.1 $\pm$ 0.65                   | 1.8 $\pm$ 0.02                        | 51.3 $\pm$ 1.1                       |
| W2                 | 0.8 $\pm$ 0.1                    | 0.8 $\pm$ 0.2                         | 62.6 $\pm$ 1.1                       | 2.8 $\pm$ 0.35                   | 8.0 $\pm$ 0.3                         | 54.2 $\pm$ 0.55                      |
| Control            | ND                               | ND                                    | 68.0 $\pm$ 2.1                       | ND                               | ND                                    | 68.7 $\pm$ 1.2                       |

ND: Not determined

Statistical analysis: \*p < 0.001 with respect to control value.

**Table S2.** Morphological, phenotypical and biochemical properties of *P. aeruginosa* strain NBTU-01

| <b>Morphological and phenotypic characteristics</b> |                         |
|-----------------------------------------------------|-------------------------|
| <b>Parameters</b>                                   | <b>Observations</b>     |
| Size                                                | Small                   |
| Pigment                                             | Greenish in color       |
| Form                                                | Rod                     |
| Margin                                              | Umbonate elevation      |
| Transparency                                        | Opaque                  |
| Shape                                               | Regular                 |
| Surface morphology                                  | Smooth, slightly mucoid |
| <b>Biochemical characteristics</b>                  |                         |
| Catalase                                            | +                       |
| Oxidase                                             | +                       |
| Citrate utilization                                 | +                       |
| Urease                                              | +                       |
| Gelatin hydrolysis                                  | +                       |
| Starch hydrolysis                                   | -                       |
| Lipid hydrolysis                                    | -                       |
| Casein hydrolysis                                   | -                       |
| MR-VP                                               | -                       |

+ indicate presence of activity, - indicates absence of activity

**Table S3.** A composition of the type of rhamnolipids produced by different *P. aeruginosa* strains during growth on glycerol supplemented M9 medium. <sup>a</sup> Predominant rhamnolipids in the sample.

| <b>Mono-rhamnolipid</b>                              | <b>Di-rhamnolipid</b>        | <b>References</b> |
|------------------------------------------------------|------------------------------|-------------------|
| Main carbon source= glycerol (8 homologues detected) |                              | This work         |
| Rha-C12-C8                                           | Rha-Rha-C10-C10 <sup>a</sup> |                   |
| Rha-C12-C10                                          | Rha-Rha-C12-C10              |                   |
| Rha-C12:1                                            | Docenoyl-Rha-C10-C10         |                   |
| Rha-C14:1                                            | Rha-Rha-C12-C12              |                   |
| Main carbon source= glycerol (8 homologues detected) |                              | 54                |
| Rha-C10-C8                                           | Rha-Rha-C10-C8               |                   |
| Rha-C10-C10                                          | Rha-Rha-C10-C10 <sup>a</sup> |                   |
| Rha-C10-C12:1                                        | Rha-Rha-C10-C12:1            |                   |
| Rha-C10-C12                                          | Rha-Rha-C10-C12              |                   |
| Main carbon source=glycerol (12 homologues detected) |                              | 55                |
| Rha-C10-C10 <sup>a</sup>                             | Rha-Rha-C10-C10 <sup>a</sup> |                   |
| Rha-C8-C10                                           | Rha-Rha-C8-C10               |                   |
| Rha-C10-C8                                           | Rha-Rha-C10-C8               |                   |
| Rha-C12-C10                                          | Rha-Rha-C12-C10              |                   |
| Rha-C10-C12                                          | Rha-Rha-C10-C12              |                   |
| Rha-C10-C12:1                                        | Rha-Rha-C10-C12:1            |                   |
| Main carbon source=glycerol (10 homologues detected) |                              | 56                |
| Rha-C10-C10                                          | Rha-Rha-C10-C10              |                   |
| Rha-C12-C10                                          | Rha-Rha-C8-C10               |                   |
| Rha-C0-C12                                           | Rha-Rha-C10-C8               |                   |
| Rha-C10                                              | Rha-Rha-C12-C10              |                   |
|                                                      | Rha-Rha-C10-C12              |                   |
|                                                      | Rha-Rha-C10                  |                   |

**Table S4.** Proteomic identification of intracellular proteins of *P. aeruginosa* strain NBTU-01. The proteins are classified according to their biological functions.

| Accession No.                                                                      | Score | Coverage (%) | Unique peptides | MS-MS Peptides | Avg. Mass (kDa) | Matching Protein                            | Source of protein (Bacterial species)         | Protein family                                 | Biological Significance                                                               |
|------------------------------------------------------------------------------------|-------|--------------|-----------------|----------------|-----------------|---------------------------------------------|-----------------------------------------------|------------------------------------------------|---------------------------------------------------------------------------------------|
| <b>A. Key enzymes for L-rhamnose and rhamnolipid biosynthesis</b>                  |       |              |                 |                |                 |                                             |                                               |                                                |                                                                                       |
| gi 310696647                                                                       | 31.59 | 6            | 3               | 3              | 47.08           | RhIB                                        | <i>Pseudomonas aeruginosa</i>                 | DEAD box helicase family                       | Lipid glycosylation, RNA catabolic process                                            |
| gi 957651990                                                                       | 20.79 | 5            | 1               | 1              | 35.98           | TDP-rhamnosyltransferase 2 RhIC             |                                               | Glycosyltransferase family 2                   | Glycolipid biosynthetic process                                                       |
| gi 15596327                                                                        | 32.93 | 7            | 2               | 2              | 35.92           | rhamnosyltransferase                        | <i>Pseudomonas aeruginosa</i> PA O1           | Glucose-1-phosphate thymidyltransferase family | dTDP-rhamnose biosynthetic process, extracellular polysaccharide biosynthetic process |
| gi 15600356                                                                        | 20.97 | 4            | 1               | 1              | 32.45           | glucose-1-phosphate thymidyltransferase     |                                               |                                                |                                                                                       |
| gi 685843212                                                                       | 37.51 | 12           | 3               | 3              | 39.54           | dTDP-D-glucose 4 6-dehydratase              | <i>Pseudomonas aeruginosa</i>                 | NAD(P)-dependent epimerase/dehydratase family  | dTDP-rhamnose biosynthetic process, dTDP-4-dehydrorhamnose 3,5-epimerase activity     |
| gi 27262962                                                                        | 30.93 | 12           | 2               | 2              | 20.76           | dTDP-4-keto-6-deoxy-D-glucose 3,5 epimerase |                                               | dTDP-4-dehydrorhamnose 3,5-epimerase family    |                                                                                       |
| gi 974971520                                                                       | 26.72 | 4            | 1               | 1              | 32.62           | dTDP-4-dehydrorhamnose reductase            | <i>Pseudomonas syringae</i> pv. <i>tomato</i> | dTDP-4-dehydrorhamnose reductase family        | dTDP-rhamnose biosynthetic process, extracellular polysaccharide biosynthetic process |
| <b>B. Transcriptional factors involved in regulation of rhamnolipid production</b> |       |              |                 |                |                 |                                             |                                               |                                                |                                                                                       |
| gi 68347586                                                                        | 85.83 | 29           | 5               | 7              | 27.54           | DNA-binding response regulator AlgR         | <i>Pseudomonas protegens</i> Pf-5             | LytR/AlgR family                               | Phosphorelay signal transduction system, Transcription, Transcription regulation      |
| gi 426270388                                                                       | 23.47 | 8            | 1               | 2              | 27.65           | two-component                               |                                               |                                                |                                                                                       |

|                                                         |        |    |    |    |       |                                    |                                                             |                                          |                                                                                                                               |
|---------------------------------------------------------|--------|----|----|----|-------|------------------------------------|-------------------------------------------------------------|------------------------------------------|-------------------------------------------------------------------------------------------------------------------------------|
|                                                         |        |    |    |    |       | response regulator AlgR            |                                                             |                                          |                                                                                                                               |
| gi 359763600                                            | 23.75  | 10 | 1  | 2  | 27.61 | AlgR                               | <i>Pseudomonas fluorescens</i> F113                         |                                          |                                                                                                                               |
| gi 15599917                                             | 42.02  | 7  | 1  | 1  | 17.34 | suppressor protein DksA            | <i>Pseudomonas aeruginosa</i> PA O1                         | DksA family                              | Negative regulation of lipid biosynthetic process, proteolysis, transcription and positive regulation of cellular respiration |
| gi 404306098                                            | 26.34  | 14 | 1  | 1  | 16.92 | DksA                               | <i>Pseudomonas fluorescens</i> R124                         |                                          |                                                                                                                               |
| gi 10764670                                             | 25.95  | 5  | 1  | 2  | 69.4  | GidA                               | <i>Pseudomonas syringae</i> pv. <i>syringae</i>             | MnmG family                              | tRNA processing, tRNA wobble uridine modification, oxidoreductase activity                                                    |
| <b>C. Proteins involved in other cellular functions</b> |        |    |    |    |       |                                    |                                                             |                                          |                                                                                                                               |
| gi 15599581                                             | 356.78 | 30 | 14 | 29 | 57.08 | molecular chaperone GroEL          | <i>Pseudomonas aeruginosa</i> PA O1                         | Chaperonin (HSP60) family                | Protein folding                                                                                                               |
| gi 999193                                               | 196.34 | 58 | 12 | 13 | 10.26 | GroES                              | <i>Pseudomonas aeruginosa</i>                               | GroESchaperonin family                   |                                                                                                                               |
| gi 71557054                                             | 190.65 | 31 | 10 | 25 | 57.19 | chaperonin, 60 kDa                 | <i>Pseudomonas savastanoi</i> pv. <i>phaseolicola</i> 1448A | Chaperonin (HSP60) family                |                                                                                                                               |
| gi 730464226                                            | 113.08 | 12 | 5  | 6  | 77.75 | elongation factor G                | <i>Pseudomonas aeruginosa</i>                               | Classic translation factor GTPase family | Protein biosynthesis                                                                                                          |
| gi 844726625                                            | 138.51 | 24 | 1  | 11 | 43.38 | elongation factor Tu               |                                                             |                                          |                                                                                                                               |
| gi 576715139                                            | 177.51 | 30 | 6  | 14 | 43.52 | translation elongation factor Tu   | <i>Pseudomonas</i> sp. GM30                                 |                                          |                                                                                                                               |
| gi 15599473                                             | 227.01 | 39 | 14 | 22 | 43.37 | elongation factor Tu               | <i>Pseudomonas aeruginosa</i> PA O1                         |                                          |                                                                                                                               |
| gi 489255485                                            | 47.44  | 2  | 1  | 1  | 90.75 | translation initiation factor IF-2 | <i>Pseudomonas aeruginosa</i>                               |                                          |                                                                                                                               |



|              |        |    |    |    |        |                                           |                                                                   |                                                                      |                                                                     |
|--------------|--------|----|----|----|--------|-------------------------------------------|-------------------------------------------------------------------|----------------------------------------------------------------------|---------------------------------------------------------------------|
| gi 643985067 | 24.3   | 2  | 1  | 1  | 74.96  | methionine--<br>tRNA ligase               |                                                                   | Class-I aminoacyl-<br>tRNAsynthetase<br>family                       |                                                                     |
| gi 518316414 | 92.13  | 5  | 2  | 3  | 77.58  | elongation<br>factor G                    |                                                                   | Classic translation<br>factor GTPase<br>family                       |                                                                     |
| gi 565827107 | 42.88  | 2  | 1  | 1  | 50.11  | dihydrolipoyl<br>dehydrogen<br>ase        |                                                                   |                                                                      | Glycolysis                                                          |
| gi 320329264 | 108.84 | 9  | 5  | 5  | 50.10  | dihydrolipoa<br>mide<br>dehydrogen<br>ase | <i>Pseudomonas<br/>savastanoipv.<br/>glycinea str.<br/>race 4</i> | Class-I pyridine<br>nucleotide-disulfide<br>oxidoreductase<br>family | Glycolysis,<br>Oxidoreductase<br>activity, cell redox<br>heomstasis |
| gi 852183060 | 116.2  | 14 | 6  | 6  | 50.16  | dihydrolipoyl<br>dehydrogen<br>ase        | <i>Pseudomonas<br/>aeruginosa</i>                                 |                                                                      | Glycolysis                                                          |
| gi 730736148 | 82.56  | 9  | 3  | 3  | 39.44  | phosphoglyc<br>erate kinase               |                                                                   | Phosphoglycerate<br>kinase family                                    |                                                                     |
| gi 15596035  | 35.41  | 9  | 1  | 1  | 17.26  | glutathione<br>peroxidase                 | <i>Pseudomonas<br/>aeruginosaPA<br/>O1</i>                        | Glutathione<br>peroxidase family                                     |                                                                     |
| gi 759433819 | 41.56  | 2  | 1  | 1  | 88.66  | endopeptida<br>se La                      | <i>Pseudomonas<br/>aeruginosa</i>                                 | Peptidase S16<br>family                                              |                                                                     |
| gi 15599956  | 64.28  | 12 | 2  | 2  | 20.70  | heat shock<br>protein GrpE                | <i>Pseudomonas<br/>aeruginosaPA<br/>O1</i>                        | GrpE family                                                          |                                                                     |
| gi 15599955  | 222.98 | 35 | 15 | 21 | 68.40  | molecular<br>chaperone<br>DnaK            |                                                                   | Heat shock protein<br>70 family                                      |                                                                     |
| gi 60549563  | 123    | 10 | 1  | 7  | 68.74  | DnaK                                      | <i>Pseudomonas<br/>putida</i>                                     |                                                                      | Stress response                                                     |
| gi 685935753 | 123.09 | 8  | 6  | 7  | 103.41 | Clp protease<br>ClpC                      |                                                                   | ClpA/ClpB family                                                     |                                                                     |
| gi 743510175 | 103.89 | 16 | 1  | 7  | 68.38  | molecular<br>chaperone<br>DnaK            |                                                                   | Heat shock protein<br>70 family                                      |                                                                     |
| gi 730495440 | 86.44  | 9  | 5  | 5  | 71.66  | molecular<br>chaperone<br>HtpG            | <i>Pseudomonas<br/>aeruginosa</i>                                 | Heat shock protein<br>90 family                                      |                                                                     |
| gi 959920977 | 103.05 | 26 | 5  | 5  | 15.71  | universal<br>stress<br>protein<br>UspA    |                                                                   | Universal stress<br>protein A family                                 |                                                                     |

|               |       |    |   |   |       |                                                 |                                     |                                           |                                                          |
|---------------|-------|----|---|---|-------|-------------------------------------------------|-------------------------------------|-------------------------------------------|----------------------------------------------------------|
| gi 685940847  | 71.93 | 3  | 2 | 2 | 50.29 | serine protease MucD                            |                                     | Peptidase S1C family                      |                                                          |
| gi 959888827  | 64.47 | 22 | 4 | 4 | 17.28 | lipid hydroperoxide peroxidase                  |                                     | Peroxiredoxin (PRX) family                |                                                          |
| gi 959864041  | 59.15 | 3  | 1 | 2 | 91.62 | ATP-dependent chaperone ClpB                    |                                     | ClpA/ClpB family                          |                                                          |
| gi 489181310  | 48.14 | 15 | 2 | 2 | 20.42 | MULTISPECIES: tellurium resistance protein TerE | <i>Pseudomonas</i>                  | terD/terE/terZ family                     |                                                          |
| gi 1001954107 | 40.82 | 9  | 1 | 1 | 16.52 | UspA domain-containing protein                  | <i>Pseudomonas aeruginosa</i>       | Universal stress protein A family         |                                                          |
| gi 759371605  | 74.49 | 11 | 1 | 1 | 14.70 | peroxiredoxin OsmC                              |                                     | OsmC/Ohr family                           |                                                          |
| gi 685895501  | 64.95 | 9  | 2 | 2 | 31.83 | chaperone protein HchA                          |                                     | Peptidase C56 family                      |                                                          |
| gi 404302499  | 32.92 | 15 | 2 | 2 | 20.89 | GrpE                                            | <i>Pseudomonas fluorescens</i> R124 | GrpE family                               |                                                          |
| gi 730411503  | 43.65 | 5  | 1 | 1 | 19.87 | alkylhydroperoxidase                            | <i>Pseudomonas aeruginosa</i>       | AhpD family                               |                                                          |
| gi 730441130  | 28.88 | 7  | 1 | 1 | 16.21 | alkylhydroperoxidase                            |                                     |                                           |                                                          |
| gi 928214863  | 28.98 | 2  | 1 | 1 | 65.58 | acyl-CoA dehydrogenase                          | <i>Pseudomonas fuscovaginae</i>     | Acyl-CoA dehydrogenase family             | Oxidoreductase activity, acyl coA dehydrogenase activity |
| gi 499793935  | 21.41 | 2  | 1 | 1 | 48.48 | cytochrome P450                                 | <i>Rhodopseudomonas palustris</i>   | Cytochrome P450 family                    | Monooxygenase activity                                   |
| gi 32967107   | 26.59 | 4  | 2 | 2 | 58.91 | LapN                                            | <i>Pseudomonas alkylphenolia</i>    | Methane/Phenol/Toluene Hydroxylase family | Cellular aromatic compound metabolic process             |

|              |        |    |   |   |        |                                                          |                                                  |                                                      |                                                        |                                              |
|--------------|--------|----|---|---|--------|----------------------------------------------------------|--------------------------------------------------|------------------------------------------------------|--------------------------------------------------------|----------------------------------------------|
| gi 489230774 | 20.6   | 3  | 1 | 1 | 40.13  | muconatecy cloisomerase                                  |                                                  | Mandelateracemas e/muconatelactonizing enzyme family | Amino acid catabolism, aromatic hydrocarbon catabolism |                                              |
| gi 490472260 | 110.66 | 22 | 5 | 5 | 42.95  | dihydrolipoidesuccinyltransferase                        | <i>Pseudomonas aeruginosa</i>                    | 2-oxoacid dehydrogenase family                       | TCA Cycle                                              |                                              |
| gi 686194421 | 126.65 | 17 | 4 | 4 | 45.40  | malate dehydrogenase                                     |                                                  | MDH type 2 family                                    |                                                        |                                              |
| gi 928214574 | 27.54  | 3  | 2 | 2 | 79.78  | isocitrate dehydrogenase, NADP-dependent, monomeric type | <i>Pseudomonas fuscovaginae</i>                  | Isocitrate dehydrogenase family                      |                                                        |                                              |
| gi 576714049 | 121.88 | 25 | 8 | 8 | 29.94  | succinyl-CoA synthetase, alpha subunit                   | <i>Pseudomonas sp.</i> GM30                      | Succinate/malate CoA ligase beta subunit family      |                                                        |                                              |
| gi 15599529  | 44.46  | 4  | 3 | 3 | 54.76  | fumarase                                                 | <i>Pseudomonas aeruginosa</i> PAO1               | Class-II fumarase/aspartase family                   |                                                        |                                              |
| gi 913661954 | 24.63  | 2  | 1 | 1 | 63.67  | succinate dehydrogenase                                  | <i>Pseudomonas fluorescens</i> NCIMB 11764       | FAD-dependent oxidoreductase 2 family                |                                                        |                                              |
| gi 759852432 | 79.34  | 8  | 3 | 3 | 41.53  | succinyl-CoA ligase subunit beta                         | <i>Pseudomonas aeruginosa</i>                    | Succinate/malate CoA ligase beta subunit family      |                                                        |                                              |
| gi 564009570 | 44.98  | 3  | 1 | 1 | 40.36  | citrate synthase/methylcitrate synthase                  |                                                  | Citrate synthase family                              |                                                        |                                              |
| gi 557557463 | 67.35  | 8  | 5 | 5 | 66.11  | pyruvate carboxylase                                     | <i>Pseudomonas aeruginosa</i> VR FPA05           | Pyruvate carboxylase family                          |                                                        | Biotin carboxylase activity, gluconeogenesis |
| gi 15596597  | 26.74  | 2  | 2 | 2 | 116.88 | pyruvate carboxylase                                     | <i>Pseudomonas aeruginosa</i> PAO1               |                                                      |                                                        |                                              |
| gi 331024675 | 21.55  | 3  | 1 | 1 | 53.95  | acetyl-CoA hydrolase                                     | <i>Pseudomonas coronafaciens pv. oryzae str.</i> | Acetyl-CoA hydrolase/transferase family              | Acetyl CoA metabolic process                           |                                              |

|                |        |    |   |   |       |                                                      | 1_6                                             |                                           |                         |                                          |
|----------------|--------|----|---|---|-------|------------------------------------------------------|-------------------------------------------------|-------------------------------------------|-------------------------|------------------------------------------|
| gi 666690932   | 25.92  | 2  | 1 | 1 | 72.72 | acetyl-CoA hydrolase                                 | <i>Pseudomonas amygdalipv. tabaci str. 6605</i> |                                           |                         |                                          |
| gi 15600131    | 29.54  | 6  | 2 | 2 | 46.81 | adenylosuccinatesynthetase                           | <i>Pseudomonas aeruginosa</i> PAO1              | Adenylosuccinatesynthetase family         | Nucleotide biosynthesis |                                          |
| gi 730562452   | 137.75 | 32 | 5 | 5 | 15.59 | nucleosidediphosphate kinase                         | <i>Pseudomonas aeruginosa</i>                   | NDK family                                |                         |                                          |
| gi 730628152   | 83.53  | 32 | 3 | 3 | 14.27 | nucleosidediphosphate kinase regulator, partial      |                                                 |                                           |                         |                                          |
| gi 15598882    | 21.51  | 4  | 1 | 1 | 23.11 | adenylate kinase                                     | <i>Pseudomonas aeruginosa</i> PAO1              | Adenylate kinase family                   |                         |                                          |
| gi 489208621   | 41.8   | 3  | 1 | 1 | 38.31 | dihydroorotase                                       | <i>Pseudomonas aeruginosa</i>                   | DHOase family                             |                         |                                          |
| gi 759362708   | 45.09  | 11 | 1 | 1 | 13.01 | 5-hydroxyisourate hydrolase                          |                                                 | Transthyretin family                      |                         |                                          |
| gi 730604841   | 32.57  | 3  | 1 | 1 | 36.13 | adenosine deaminase                                  |                                                 | Adenosine and AMP deaminases family       |                         |                                          |
| gi 100093550_1 | 26     | 2  | 1 | 1 | 63.28 | hemolysinactivation/secretion protein                |                                                 | ShIB/FhaC/HecBfamily                      |                         | Protein transport                        |
| gi 835861098   | 109.46 | 10 | 4 | 4 | 48.46 | molecular chaperone SurA                             | <i>Pseudomonas aeruginosa</i>                   | Rotamase family                           |                         | Protein transport, protein stabilization |
| gi 640489896   | 88.33  | 19 | 3 | 3 | 11.73 | phospholipid-binding protein                         |                                                 | BON family                                |                         | Phospholipid transport                   |
| gi 553789555   | 106.93 | 15 | 6 | 6 | 39.80 | branched chain amino acid ABC transporter substrate- |                                                 | Bacterial solute-binding protein 3 family | Transport activity      |                                          |

|               |        |    |   |    |       |                                                      |                                     |                                                            |
|---------------|--------|----|---|----|-------|------------------------------------------------------|-------------------------------------|------------------------------------------------------------|
|               |        |    |   |    |       | binding protein                                      |                                     |                                                            |
| gi 959920221  | 58.33  | 23 | 2 | 2  | 13.01 | azurin                                               |                                     | Plastocyanin/azurin family                                 |
| gi 1001954259 | 104.02 | 15 | 3 | 3  | 33.07 | ABC transporter                                      |                                     | Bacterial solute-binding protein 3 family                  |
| gi 15600433   | 134.12 | 42 | 4 | 4  | 11.87 | thioredoxin                                          | <i>Pseudomonas aeruginosa</i> PA O1 | Thioredoxin family                                         |
| gi 959898859  | 114.85 | 24 | 5 | 5  | 32.19 | ABC transporter substrate-binding protein            |                                     | Solute-binding family 1                                    |
| gi 685987587  | 88.11  | 15 | 3 | 3  | 23.79 | toluene tolerance protein                            |                                     | MlaC/ttg2D family                                          |
| gi 685900046  | 86.76  | 16 | 4 | 4  | 34.53 | porin                                                |                                     | OmpA family                                                |
| gi 510933646  | 52.51  | 5  | 2 | 2  | 59.73 | ABC transporter substrate-binding protein            |                                     | Solute-binding family 1                                    |
| gi 553799256  | 42.57  | 6  | 1 | 1  | 23.10 | outer membrane lipoprotein carrier protein LolA      | <i>Pseudomonas aeruginosa</i>       | LolA family                                                |
| gi 959875038  | 38.8   | 8  | 2 | 2  | 26.45 | electron transporter RnfB                            |                                     | 4Fe4S bacterial-type ferredoxin family                     |
| gi 553794897  | 182.82 | 28 | 2 | 13 | 45.16 | sugar ABC transporter substrate-binding protein      |                                     | Binding-protein-dependent transport system permease family |
| gi 751334327  | 130.54 | 13 | 4 | 4  | 39.83 | branched chain amino acid ABC transporter substrate- |                                     | Bacterial solute-binding protein 3 family                  |

|              |       |   |   |   |        |                                                       |                                 |                                           |                                   |
|--------------|-------|---|---|---|--------|-------------------------------------------------------|---------------------------------|-------------------------------------------|-----------------------------------|
|              |       |   |   |   |        | binding protein                                       |                                 |                                           |                                   |
| gi 959862992 | 41.57 | 4 | 1 | 1 | 29.78  | amino acid ABC transporter substrate-binding protein  |                                 | Bacterial solute-binding protein 3 family |                                   |
| gi 730657412 | 36.15 | 4 | 1 | 1 | 26.51  | ABC transporter substrate-binding protein             |                                 | Solute-binding family 1                   |                                   |
| gi 959922431 | 35.07 | 6 | 1 | 1 | 20.70  | ubiquinol-cytochrome c reductase iron-sulfur subunit  |                                 | Oxidoreductase family                     |                                   |
| gi 518201378 | 25.66 | 1 | 1 | 1 | 127.44 | sensor histidine kinase                               |                                 | Solute carrier 5 family                   |                                   |
| gi 489199932 | 32.6  | 3 | 1 | 1 | 38.24  | ABC transporter substrate-binding protein             |                                 | Bacterial solute-binding protein 3 family |                                   |
| gi 489252733 | 32.04 | 4 | 1 | 1 | 30.42  | phosphonate ABC transporter substrate-binding protein |                                 |                                           |                                   |
| gi 489239673 | 32.55 | 2 | 1 | 1 | 46.48  | porin                                                 |                                 | OprB family                               |                                   |
| gi 787858374 | 24.68 | 4 | 2 | 2 | 55.37  | F0F1 ATP synthase subunit alpha                       | <i>Pseudomonas chlororaphis</i> | ATPase alpha/beta chains family           | ATP synthesis, transport activity |
| gi 787858376 | 62.26 | 9 | 3 | 3 | 49.44  | F0F1 ATP synthase subunit beta                        |                                 |                                           |                                   |
| gi 489190867 | 40.14 | 4 | 2 | 2 | 55.38  | ATP synthase                                          | <i>Pseudomonas aeruginosa</i>   |                                           |                                   |

|               |       |    |   |   |        |                                                                 |                                                  |                                                            |                                                                                                                                                     |                                                 |
|---------------|-------|----|---|---|--------|-----------------------------------------------------------------|--------------------------------------------------|------------------------------------------------------------|-----------------------------------------------------------------------------------------------------------------------------------------------------|-------------------------------------------------|
|               |       |    |   |   |        | subunit alpha                                                   |                                                  |                                                            |                                                                                                                                                     |                                                 |
| gi 685898620  | 90.21 | 13 | 4 | 4 | 40.50  | spermidine/putrescine ABC transporter substrate-binding protein | <i>Pseudomonas syringae</i> pv. <i>tomato</i> T1 | Binding-protein-dependent transport system permease family | Polyamine transport                                                                                                                                 |                                                 |
| gi 730561914  | 68.78 | 4  | 1 | 1 | 37.05  | C4-dicarboxylate ABC transporter                                |                                                  | Tripartite ATP-independent periplasmic transporter family  | Periplasmic transporter activity                                                                                                                    |                                                 |
| gi 553756307  | 96.99 | 12 | 3 | 3 | 36.53  | sulfate ABC transporter substrate-binding protein               |                                                  | Prokaryotic sulfate-binding protein family                 | Secondary active sulfate transmembrane transporter activity, sulfate transmembrane-transporting ATPase activity, sulphur compound metabolic process |                                                 |
| gi 553777858  | 93.4  | 3  | 2 | 2 | 55.58  | catalase                                                        |                                                  | Catalase family                                            | Hydrogen peroxide catabolic process, response to hydrogen peroxide                                                                                  |                                                 |
| gi 213928538  | 38.16 | 3  | 2 | 2 | 82.66  | catalase/peroxidase HPI                                         |                                                  | Peroxidase family                                          |                                                                                                                                                     |                                                 |
| gi 730239109  | 92.05 | 5  | 3 | 3 | 115.39 | ribonuclease E                                                  |                                                  | <i>Pseudomonas aeruginosa</i>                              | RNase E/G family                                                                                                                                    | RNA catabolic process, tRNA and rRNA processing |
| gi 959948237  | 91.59 | 17 | 3 | 3 | 23.37  | isoprenoid biosynthesis protein ElbB                            |                                                  |                                                            | Not specified                                                                                                                                       | Transferase activity                            |
| gi 489254440  | 81.63 | 2  | 3 | 3 | 178.73 | Large exoproteins involved in heme utilization or adhesion      |                                                  |                                                            | ShIA/HecA/FhaA family                                                                                                                               | Cell adhesion                                   |
| gi 1001043234 | 81.06 | 10 | 2 | 2 | 34.50  | phosphate-binding protein                                       | PstS family                                      |                                                            | Cell adhesion, Phosphate transport, Transport, Virulence                                                                                            |                                                 |

|               |       |    |   |   |        |                                                      |                                    |                                  |                                 |
|---------------|-------|----|---|---|--------|------------------------------------------------------|------------------------------------|----------------------------------|---------------------------------|
| gi 742352091  | 78.87 | 11 | 2 | 2 | 15.94  | copper chaperone                                     |                                    | CopZ family                      | Chaperone, copper ion transport |
| gi 730686201  | 28.24 | 9  | 1 | 1 | 13.06  | 50S ribosomal protein L19                            |                                    | Ribosomal protein L19P family    | Translation                     |
| gi 950499024  | 78.28 | 13 | 2 | 2 | 22.62  | 50S ribosomal protein L3                             |                                    | Ribosomal protein L3P family     |                                 |
| gi 1001046479 | 74.07 | 17 | 2 | 2 | 21.96  | 50S ribosomal protein L25/general stress protein Ctc |                                    | Ribosomal protein L25P family    |                                 |
| gi 15599935   | 57.25 | 24 | 1 | 1 | 10.12  | 30S ribosomal protein S15                            |                                    | Ribosomal protein S15P family    | Translation regulation          |
| gi 730383240  | 37.64 | 6  | 1 | 1 | 24.21  | 50S ribosomal protein L1                             |                                    | Ribosomal protein L1P family     |                                 |
| gi 730526514  | 48.02 | 1  | 2 | 2 | 150.04 | DNA-directed RNA polymerase subunit beta             |                                    | RNA polymerase beta chain family | Transcription                   |
| gi 514414261  | 43.35 | 1  | 1 | 1 | 154.10 | DNA-directed RNA polymerase subunit beta             |                                    |                                  |                                 |
| gi 730609375  | 29.51 | 4  | 1 | 1 | 25.62  | DNA-binding response regulator                       |                                    | Not specified                    | Transcription regulation        |
| gi 730522340  | 45.61 | 10 | 1 | 1 | 12.80  | transcriptional regulator                            |                                    | Not specified                    |                                 |
| gi 822019811  | 86.58 | 12 | 3 | 3 | 34.35  | RNA polymerase sigma-H factor AlgU                   |                                    | Sigma-70 factor family           |                                 |
| gi 15595653   | 60.33 | 19 | 1 | 1 | 7.71   | cold-shock protein                                   | <i>Pseudomonas aeruginosa</i> PAO1 | CSD family                       |                                 |



|                   |        |    |   |   |        |                                                         |                                    |                                                                 |                                                                             |
|-------------------|--------|----|---|---|--------|---------------------------------------------------------|------------------------------------|-----------------------------------------------------------------|-----------------------------------------------------------------------------|
| gi 988890275      | 55.46  | 13 | 1 | 1 | 13.37  | transcriptional regulator                               | <i>Pseudomonas aeruginosa</i>      | Not specified                                                   |                                                                             |
| gi 100104551<br>2 | 39.99  | 7  | 1 | 1 | 20.18  | transcription termination/ antitermination protein NusG |                                    | NusG family                                                     |                                                                             |
| gi 730278173      | 46.34  | 6  | 2 | 2 | 40.68  | DNA polymerase III subunit beta                         |                                    | DNA polymerase type-C family                                    | Replication                                                                 |
| gi 759434958      | 55.7   | 22 | 2 | 2 | 9.70   | DNA-binding protein HU-alpha                            |                                    | Bacterial histone-like protein family                           | DNA Condensation                                                            |
| gi 15597001       | 71.86  | 27 | 3 | 3 | 9.09   | DNA-binding protein HU                                  | <i>Pseudomonas aeruginosa</i> PAO1 |                                                                 |                                                                             |
| gi 822018644      | 70.18  | 12 | 2 | 2 | 13.69  | rod shape-determining protein RodA                      | <i>Pseudomonas aeruginosa</i>      | SEDS family                                                     | Cell cycle, cell division, regulation in cell shape                         |
| gi 510945409      | 69.65  | 5  | 3 | 3 | 45.42  | glutamate-1-semialdehyde 2,1-aminomutase                |                                    | Class-III pyridoxal-phosphate-dependent aminotransferase family | Porphyrin biosynthesis                                                      |
| gi 489210699      | 69.32  | 20 | 4 | 4 | 20.54  | peroxiredoxin                                           |                                    | AhpC/TSA family                                                 | Peroxiredoxin activity, cell redox homeostasis, Antioxidant, Oxidoreductase |
| gi 100105577<br>7 | 67.85  | 12 | 1 | 1 | 16.44  | 6,7-dimethyl-8-ribityllumazine synthase                 |                                    | DMRL synthase family                                            | Riboflavin biosynthesis                                                     |
| gi 685899032      | 123.75 | 35 | 6 | 6 | 15.33  | homoserine acetyltransferase                            |                                    | HTA family                                                      | Amino acid biosynthesis                                                     |
| gi 759862093      | 56.98  | 1  | 1 | 1 | 117.32 | carbamoyl phosphate synthase large subunit              |                                    | CarB family                                                     |                                                                             |

|              |       |    |   |   |        |                                                    |                                                |                                                                |                       |
|--------------|-------|----|---|---|--------|----------------------------------------------------|------------------------------------------------|----------------------------------------------------------------|-----------------------|
| gi 740618957 | 59.94 | 7  | 2 | 2 | 28.11  | 4-hydroxy-tetrahydrodipicolinate synthase          |                                                | DapA family                                                    |                       |
| gi 553786862 | 60.2  | 6  | 1 | 1 | 36.49  | ketol-acid reductoisomerase                        |                                                | Ketol-acid reductoisomerase family                             |                       |
| gi 730406310 | 62.66 | 7  | 2 | 2 | 34.12  | branched chain amino acid aminotransferase         |                                                | Class-IV pyridoxal-phosphate-dependent aminotransferase family |                       |
| gi 749659485 | 86.08 | 9  | 5 | 5 | 44.16  | aspartate kinase                                   |                                                | Aspartokinase family                                           |                       |
| gi 333113900 | 40.7  | 12 | 4 | 4 | 51.86  | glutamate synthase, small subunit                  | <i>Pseudomonas fulva</i> 12-X                  | Glutamate synthase family                                      |                       |
| gi 768690557 | 26.99 | 1  | 2 | 2 | 161.59 | putative glutamate synthase [NADPH], large subunit | <i>Pseudomonas sp.</i> HMSC05H02               |                                                                |                       |
| gi 489213558 | 43.25 | 4  | 1 | 1 | 28.50  | tryptophan synthase subunit alpha                  | <i>Pseudomonas aeruginosa</i>                  | TrpA family                                                    |                       |
| gi 489249800 | 38.8  | 4  | 1 | 1 | 49.10  | cystathionine beta-synthase                        |                                                | Cystathionine beta-synthase family                             |                       |
| gi 565826207 | 39.36 | 6  | 2 | 2 | 51.96  | glutamine synthetase                               |                                                | Glutamine synthetase family                                    |                       |
| gi 489253047 | 30.74 | 3  | 1 | 1 | 43.71  | tryptophan synthase subunit beta                   |                                                | TrpB family                                                    |                       |
| gi 582004101 | 48.14 | 14 | 3 | 4 | 48.82  | glutamate dehydrogenase                            | <i>Pseudomonas pseudoalcaligenes</i> CECT 5344 | Glu/Leu/Phe/Val dehydrogenases family                          | Amino acid metabolism |
| gi 15599784  | 25.46 | 7  | 1 | 2 | 48.86  | glutamate dehydrogenase                            | <i>Pseudomonas aeruginosa</i> PA O1            |                                                                |                       |

|               |       |    |   |   |       |                                                      |                                 |                                                                 |                                                                              |
|---------------|-------|----|---|---|-------|------------------------------------------------------|---------------------------------|-----------------------------------------------------------------|------------------------------------------------------------------------------|
| gi 928212666  | 64.03 | 18 | 6 | 6 | 43.33 | acetylornithine/succinylornithine aminotransferase   | <i>Pseudomonas fuscovaginae</i> | Class-III pyridoxal-phosphate-dependent aminotransferase family |                                                                              |
| gi 727810341  | 28.63 | 3  | 1 | 1 | 44.53 | N-succinylglutamate 5-semialdehyde dehydrogenase     | <i>Pseudomonas aeruginosa</i>   | Aldehyde dehydrogenase family                                   |                                                                              |
| gi 6002915    | 26.75 | 5  | 2 | 2 | 39.77 | chloromuconate cycloisomerase                        |                                 | Mandelate racemase/muconate lactonizing enzyme family           | Amino acid catabolism                                                        |
| gi 1000934201 | 32.34 | 4  | 1 | 1 | 38.67 | L-asparaginase                                       |                                 | Asparaginase 1 family                                           |                                                                              |
| gi 730718422  | 61.52 | 15 | 1 | 3 | 28.22 | methionine ABC transporter substrate-binding protein |                                 | DNA mismatch repair MutS family                                 | Mismatch repair                                                              |
| gi 730551508  | 81.81 | 22 | 2 | 4 | 28.10 | methionine ABC transporter substrate-binding protein |                                 |                                                                 |                                                                              |
| gi 759865090  | 58.84 | 13 | 2 | 2 | 17.28 | ecotin                                               |                                 | Protease inhibitor I11 (ecotin) family                          | Protease inhibitor                                                           |
| gi 751334232  | 29.13 | 7  | 1 | 1 | 17.32 | ecotin                                               |                                 |                                                                 |                                                                              |
| gi 959838988  | 58.3  | 21 | 2 | 2 | 17.51 | chemotaxis protein CheW                              |                                 | CheW family                                                     | Signal transducer activity, chemotaxis                                       |
| gi 499198003  | 54.83 | 1  | 1 | 1 | 92.98 | nitrate reductase catalytic subunit                  |                                 | Prokaryotic molybdopterin-containing oxidoreductase family      | Electron transport, nitrate assimilation, transport, oxidoreductase activity |
| gi 518225896  | 54.7  | 3  | 1 | 1 | 59.76 | gamma-glutamyltran                                   |                                 | Gamma-glutamyltransferase                                       | Glutathione biosynthesis                                                     |

|              |       |    |   |   |       | speptidase                                    |                                                       | family                                          |                                                                                                  |
|--------------|-------|----|---|---|-------|-----------------------------------------------|-------------------------------------------------------|-------------------------------------------------|--------------------------------------------------------------------------------------------------|
| gi 320330409 | 27.26 | 8  | 1 | 1 | 32.00 | thioredoxin                                   | <i>Pseudomonas savastanoipv. glycinea str. race 4</i> | Thioredoxin family                              | Cell redox homeostasis, glycerol ether metabolic process,                                        |
| gi 553762809 | 52.42 | 8  | 2 | 2 | 31.94 | co-chaperone YbbN                             | <i>Pseudomonas aeruginosa</i>                         | ybbN protein family                             | Oxidoreductase activity                                                                          |
| gi 490480111 | 50.44 | 5  | 2 | 2 | 25.31 | succinyl-CoA--3-ketoacid-CoA transferase      |                                                       | 3-oxoacid CoA-transferase family                | Ketone body catabolic process                                                                    |
| gi 501655356 | 45.37 | 10 | 2 | 2 | 23.98 | ketohydroxy glutarate aldolase                |                                                       | KDPG/KHG aldolase family                        | 2-dehydro-3-deoxy-phosphogluconate aldolase activity, 4-hydroxy-2-oxoglutarate aldolase activity |
| gi 489188245 | 40.72 | 4  | 1 | 1 | 33.82 | MULTISPECIES: thioredoxin-disulfide reductase |                                                       | <i>Pseudomonas</i>                              | Class-II pyridine nucleotide-disulfide oxidoreductase family                                     |
| gi 730332388 | 44.32 | 8  | 1 | 1 | 23.41 | thiol:disulfide interchange protein DsbA      | <i>Pseudomonas aeruginosa</i>                         | Thioredoxin family                              | Cell redox homeostasis, protein folding                                                          |
| gi 553752507 | 41.01 | 7  | 1 | 1 | 12.92 | PA-I galactophilic lectin                     |                                                       | PA-IL-like protein family                       | Carbohydrate binding                                                                             |
| gi 489255221 | 39.24 | 3  | 1 | 1 | 41.95 | chitin-binding protein CbpD                   |                                                       | CBP family                                      | Carbohydrate metabolic process                                                                   |
| gi 558688971 | 40.57 | 19 | 2 | 2 | 13.35 | 4a-hydroxytetrahydrobiopterin dehydratase     |                                                       | Pterin-4-alpha-carbinolamine dehydratase family | Tetrahydrobiopterin biosynthetic process                                                         |
| gi 852075221 | 40.35 | 3  | 2 | 2 | 73.71 | PrkA family serine                            |                                                       | PrkA family                                     | Protein kinase activity                                                                          |

|              |       |    |   |   |       |                                      |                               |                                                                                              |                         |
|--------------|-------|----|---|---|-------|--------------------------------------|-------------------------------|----------------------------------------------------------------------------------------------|-------------------------|
|              |       |    |   |   |       | protein kinase                       |                               |                                                                                              |                         |
| gi 759456745 | 39.3  | 24 | 1 | 1 | 9.68  | chromosome partitioning protein ParA |                               | ParA family                                                                                  | Chromosome segregation  |
| gi 489194016 | 28.76 | 2  | 1 | 1 | 64.35 | MULTISPECIES: acyl-CoA dehydrogenase | <i>Pseudomonas</i>            | Acyl-CoA dehydrogenase family                                                                | Oxidoreductase activity |
| gi 959882353 | 29.4  | 2  | 1 | 1 | 41.78 | acyl-CoA dehydrogenase               |                               |                                                                                              |                         |
| gi 730279592 | 36.89 | 6  | 1 | 1 | 22.19 | nitroreductase                       |                               | Nitroreductase family                                                                        |                         |
| gi 685899885 | 35.78 | 4  | 1 | 1 | 35.69 | amino acid dehydrogenase             |                               | Oxidoreductase family                                                                        |                         |
| gi 553763722 | 26.36 | 2  | 1 | 1 | 38.63 | oxidoreductase                       |                               |                                                                                              |                         |
| gi 565900676 | 53.21 | 5  | 2 | 2 | 50.07 | aldehyde dehydrogenase               |                               | Aldehyde dehydrogenase family                                                                |                         |
| gi 501025821 | 82.76 | 8  | 3 | 3 | 53.15 | aldehyde dehydrogenase               | <i>Pseudomonas aeruginosa</i> |                                                                                              |                         |
| gi 501025052 | 82.5  | 18 | 2 | 2 | 21.37 | superoxide dismutase [Fe]            |                               | Iron/manganese superoxide dismutase family                                                   |                         |
| gi 1256708   | 32.4  | 12 | 2 | 2 | 29.14 | dihydrodiol dehydrogenase            |                               | Short-chain dehydrogenases/reductases (SDR) family                                           |                         |
| gi 730284259 | 24.83 | 2  | 1 | 1 | 35.19 | NADPH:quinone reductase              |                               | Medium chain Dehydrogenases/reductase (MDR)/zinc-dependent alcohol dehydrogenase-like family |                         |
| gi 145692874 | 24.63 | 6  | 2 | 2 | 36.33 | HCH-reductase                        |                               | Oxidoreductase family                                                                        |                         |

|                   |       |    |   |   |       | LinF                                                                             |                                            |                                                                                                           |
|-------------------|-------|----|---|---|-------|----------------------------------------------------------------------------------|--------------------------------------------|-----------------------------------------------------------------------------------------------------------|
| gi 100106831<br>2 | 34.14 | 9  | 1 | 1 | 17.44 | Hcp1 family<br>type VI<br>secretion<br>system<br>effector                        |                                            | Hcp1 family<br>Endonuclease activity                                                                      |
| gi 730333325      | 33.68 | 2  | 1 | 1 | 53.56 | biofilm<br>formation<br>protein PslB                                             |                                            | Mannose-6-<br>phosphate<br>isomerase type 2<br>family<br>Polysaccharide<br>biosynthetic process           |
| gi 730304091      | 33.52 | 8  | 1 | 1 | 13.21 | two-<br>component<br>system<br>response<br>regulator                             |                                            | Not specified<br>Two-component<br>regulatory system,<br>transcription<br>regulation                       |
| gi 640474228      | 32.71 | 11 | 1 | 1 | 16.71 | nitrogen<br>regulatory<br>protein                                                |                                            | Not specified<br>Phosphoenolpyruvate-<br>dependent sugar<br>phosphotransferase<br>system, kinase activity |
| gi 852081788      | 26.52 | 5  | 1 | 1 | 20.67 | pilus<br>assembly<br>protein PilZ                                                |                                            | PilZ family<br>Pilus assembly                                                                             |
| gi 730301699      | 26.26 | 3  | 1 | 1 | 41.57 | acetyl-CoA<br>acetyltransfe<br>rase                                              |                                            | Thiolase family<br>Lipid metabolism                                                                       |
| gi 15598209       | 21.55 | 3  | 1 | 1 | 41.64 | 3-ketoacyl-<br>CoA thiolase                                                      | <i>Pseudomonas<br/>aeruginosa</i> PA<br>O1 |                                                                                                           |
| gi 989001359      | 47.28 | 10 | 1 | 1 | 16.43 | acetyl-CoA<br>carboxylase<br>biotin<br>carboxyl<br>carrier<br>protein<br>subunit | <i>Pseudomonas<br/>aeruginosa</i>          | AccD/PCCB family<br>Lipid biosynthesis                                                                    |
| gi 553798646      | 23.43 | 8  | 1 | 1 | 12.56 | DNA-binding<br>transcription<br>al activator<br>OsmE                             |                                            | SmpA / OmlA family<br>DNA binding                                                                         |
| gi 953533548      | 23.42 | 4  | 1 | 1 | 31.69 | metallopepti<br>dase                                                             |                                            | Zn peptidase family<br>Hydrolase activity,<br>metalloprotease<br>activity                                 |

|              |       |    |   |   |        |                                                |                                   |                                                                  |                                                                                                     |
|--------------|-------|----|---|---|--------|------------------------------------------------|-----------------------------------|------------------------------------------------------------------|-----------------------------------------------------------------------------------------------------|
| gi 553765499 | 23.18 | 1  | 1 | 1 | 70.99  | protease                                       |                                   | Trypsin 2/<br>Endonuclease NS<br>family                          | Protease activity                                                                                   |
| gi 959908322 | 22.92 | 3  | 1 | 1 | 33.98  | type III<br>secretion<br>system<br>protein     |                                   | FliMN C family                                                   | Cell motility,<br>Intracellular trafficking,<br>secretion, and<br>vesicular transport               |
| gi 730357728 | 22.32 | 8  | 1 | 1 | 12.18  | iron donor<br>protein<br>CyaY                  |                                   | FrataxinCyaY family                                              | Oxidative stress<br>response, cellular iron<br>ion homeostasis,<br>glutathione metabolic<br>process |
| gi 959913462 | 53.04 | 15 | 1 | 1 | 11.19  | peptidase                                      |                                   | Peptidase family                                                 | Hydrolase activity                                                                                  |
| gi 730265471 | 75.57 | 7  | 2 | 2 | 47.25  | peptidase                                      |                                   |                                                                  |                                                                                                     |
| gi 730520115 | 30.46 | 6  | 1 | 1 | 19.42  | inorganic<br>pyrophosph<br>atase               |                                   | PPase family                                                     | Hydrolase activity,<br>phosphate-containing<br>compound metabolic<br>process                        |
| gi 489176416 | 21.69 | 2  | 1 | 1 | 40.18  | MULTISPE<br>CIES:<br>peptidase<br>M14          | <i>Pseudomonas</i>                | Succinylglutamated<br>esuccinylase /<br>Aspartoacylase<br>family | Hydrolase activity                                                                                  |
| gi 759368125 | 54.61 | 15 | 2 | 2 | 16.38  | histidine<br>triad (HIT)<br>protein            |                                   | Histidine triad (HIT)<br>protein family                          |                                                                                                     |
| gi 640476987 | 21.47 | 1  | 1 | 1 | 141.14 | type VI<br>secretion<br>system<br>protein ImpL |                                   | IcmF family                                                      | Intracellular trafficking,<br>secretion, and<br>vesicular transport                                 |
| gi 730721957 | 21.36 | 3  | 1 | 1 | 36.49  | DNA<br>topoisomera<br>se IV<br>subunit B       | <i>Pseudomonas<br/>aeruginosa</i> | Type II<br>topoisomerase<br>family                               | Antibiotic resistance,<br>Chromosome<br>organization                                                |
| gi 935268401 | 22.17 | 1  | 1 | 1 | 94.27  | hypothetical<br>protein                        |                                   |                                                                  |                                                                                                     |
| gi 959888333 | 27.58 | 15 | 1 | 1 | 7.65   | hypothetical<br>protein                        |                                   |                                                                  |                                                                                                     |
| gi 489206432 | 21.13 | 1  | 1 | 1 | 72.51  | hypothetical<br>protein,<br>partial            |                                   | Unknown                                                          | Unknown activity                                                                                    |
| gi 959841889 | 21.15 | 7  | 1 | 1 | 26.89  | hypothetical<br>protein                        |                                   |                                                                  |                                                                                                     |

|                   |        |    |   |   |       |                               |  |  |
|-------------------|--------|----|---|---|-------|-------------------------------|--|--|
| gi 640477118      | 46.5   | 5  | 1 | 1 | 22.46 | hypothetical protein          |  |  |
| gi 917622807      | 47.96  | 15 | 1 | 1 | 9.14  | hypothetical protein          |  |  |
| gi 968123518      | 59.6   | 21 | 2 | 2 | 13.33 | hypothetical protein          |  |  |
| gi 100105840<br>4 | 63.24  | 14 | 3 | 3 | 21.35 | hypothetical protein          |  |  |
| gi 727810136      | 76.13  | 40 | 1 | 1 | 63.65 | hypothetical protein, partial |  |  |
| gi 763409557      | 162.98 | 22 | 8 | 8 | 51.25 | hypothetical protein          |  |  |
| gi 685886565      | 81.58  | 21 | 2 | 2 | 18.29 | membrane protein              |  |  |



**Table S5.** The alignments of MS-MS derived peptide sequences of *P. aeruginosa* strain NBTU-01 with the rhamnolipid synthesizing enzymes reported in the databases. The peptides identified by MS/MS sequencing in this proteome using PEAKS 7.0 software are shown in bold and putative conserved domains have been underlined.

**(1) Accession No.:** gi|310696647

**Matching Protein:** RhIB

**Bacterial Species:** *Pseudomonas aeruginosa*

MHAILIAIGSAGDVFPFIGLARTLKLGRHRSVSLCTIPVFRDAVEQHGIAFVPLSDELTYRRTMGDPRLWDPKTSFGVLWQTIAGMIEPVYEVSAQRHD  
DIVVVGSLWALGARIAHEKYGIPYLSAQVSPSTLLSAHLPPVHPK**FNVPEQMPLAMR**KLLWRCIERFK**LDRTCAPDINAVRR**KVGLLETPVKRIFTQWM  
HSPQGVVCLFPAWFAPPQQDWPQPLHMTGFPLFDGSIPTLDELQRFQDQSRPLVFTQGSTEHLQGDYFAMALRALERLGARGIFLTGAGQE  
PLRGLPNHVLQRAYAPLGLPSCAGLVHPGGIGAMSLALAAGVPQVLLPCAHDQFDNAERLVRLGCGMRLGVPLREQELRGALWRLLLEDPAMAA  
ACRRFMELSQPHSIACGKAAQVVERCHREGDARWLKAAS

**(2) Accession No.:** gi|957651990

**Matching Protein:** TDP-rhamnosyltransferase 2 RhIC

**Bacterial Species:** *Pseudomonas aeruginosa*

MDRIDMGVLVWLFNPGDDDD**LEHLGELSAAFPQLR**FLAVDNSPHSDPQRNARLRGQGIADVLYHGNRQGIAGAFNQGLDTLFRRGLQGVLLLDQDSR  
PGGAFLAAQWRNLQACNGQACLLGPRIFDRGDRRFLPAIHLDGLALRQLSLDGLTTPQRTSFLISSGCLLTREAYQRLGHFDEELFIDHVDTEYSLRA  
QALDVPLYVDPRLVLEHRIGTRKTRRLGGLSLSAMNHAPLRRYYLARNGLLVLRYYARSSPLALLANLPTLTQGLAVLLLERDKLLKLRCLGWGLWD  
GLRGRGGALERNRPRLLKRLAGPAVASVASGKAKA

**(3) Accession No.:** gi|15596327

**Matching Protein:** rhamnosyltransferase

**Bacterial Species:** *Pseudomonas aeruginosa PAO1*

MDRIDMGVLVWLFNPGDDDD**LEHLGELAAAFPQLRFLAVDNSPHSDPQR**NARLRGQGIADVLYHGNRQGIAGAFNQGLDALFRRGVQGVLLLDQDSR  
PGGAFLAAQWRNLQAR**NGQACLLGPR**IFDRGDRRFLPAIHLDGLTLRQLSLDGLTTPQRTSFLISSGCLLTREAYQRLGHFDEELFIDHVDTEYSLRA  
QALDVPLYVDPRLVLEHRIGTRKTRRLGGLSLSAMNHAPLRRYYLARNGLLVLRYYARSSPLALLANLPTLTQGLAVLLLERDKLLKLRCLGWGLWD  
GLRGRGGALETNRPRLLKRLAGPAVASVASGKAKA

**(4) Accession No.:** gi|15600356

**Matching Protein:** glucose-1-phosphate thymidyltransferase

**Bacterial Species:** *Pseudomonas aeruginosa PAO1*

**Putative conserved domain:** Glyco\_tranf\_GTA\_type superfamily

MKRKGIILAGGSGTRLHPATLAISKQLLPVYDKPMIYYPLSTLMLAGIREILIIISTPQDTPRFQQLLGDGSNWGLDLQYAVQPSPDGLAQAFDIGESFIG  
NDLSALVLDGDNLYYGHDFHELLGSASQRQTGASVFAYHVLDPERYGVVEFDQGGKAISLEEKPLEPKSNYAVTGLYFYDQQVVDIARDLKPSPRGEL  
EITDVNRAYLERGQLSVEIMGRGYAWLDTGTHDSLLEAGQFIATLENRQGLKVACPEEIA YRQKWIDAAQLEKLAAPLAKNGYGQYLKRLLTETVY

**(5) Accession No.:**gi|685843212

**Matching Protein:**dTDP-D-glucose 4 6-dehydratase

**Bacterial Species:***Pseudomonas aeruginosa*

MTILVTGSAGFIGANFVLDWLALHDEPVVSLDKLTYAGNRQNLASLDGDARHTFVAGDIGDSQLVARLLAEHQPRAILNFAAESHVDRSIHGPEDFIQ  
TNIVGTFRLLEEVRRAYWGALEPEAKAAFRFLHVSTDEVYGS LAPSDPAFTENNRYPNSPYSASKAASDHLV RAYHHTYGLPVLTTNCSNNYGPYH  
FPEKLIPLVIHNALAGKPLPIYGDGQQIRDWLYVKDHCSAIRRVLEAGQLGETYNVGGWNEKANLDVVETLCAILDQEQPRADGRSYREQITFVKDRP  
GHDRRYAIDATRLERELGWKPAETFETGIRKTVRWYLDNQDWVANVTSGAYREWVGKQYA

**(6)Accession No.:**gi|27262962

**Matching Protein:**dTDP-4-keto-6-deoxy-D-glucose 3,5 epimerase

**Bacterial Species:***Pseudomonas aeruginosa*

MKATRLAIPDVILFEPRVFGDDRGFFESYNQRAFEEACGHPVSFVQDNHSRSARGVLRGLHYQIRQAQGKLV RATLGEVFDVAVDLRRGSPTFGQ  
WVGERLSAENKRQMWIPAGFAHGFFVVLSEYAEFLYKTTDFWAPEHERCIVWNDPELKIDWPLQDAPLLSEKDRQGKAFADADCFP

**(7)Accession No.:** gi|974971520

**Matching Protein:** dTDP-4-dehydrorhamnose reductase

**Bacterial Species:** *Pseudomonas syringaepv. Tomato*

MRMRLMLLGGGNALGQALIRLGAENIGFLAPRPPQDGWDAASLTQLLDDTRPDALINLAYYFDWFQAESVSEARLTHQERSVERLAELCQHNNITL  
VQPSSYRVFDGSRATAYSEKDEPVPLGLRGQALWRIEQSVRATCPQHVLVRFVWLLDSDADGVLGRFLSRAKEPGELLLADDRRGNPTPVDDAAR  
VIISVIKQLDCEAPLWGTYHYAGHEATTPLALGQAVLTEARLLHPLAIESPTAQAHAARPDAAEPPQHAVLACKKILHTFGIKPRAWRAGLPSLLDRYY  
RHV

**Table S6.** Surface tension measurement of crude and TLC purified rhamnolipid biosurfactant produced by *P. aeruginosa* strain NBTU-01 at different pH. Values are mean  $\pm$  S.D. of three determinations.

| pH   | Surface Tension (mNm <sup>-1</sup> ) |                        |
|------|--------------------------------------|------------------------|
|      | Crude rhamnolipid                    | Purified dirhamnolipid |
| 3.0  | 72.9 $\pm$ 0.4                       | 70.9 $\pm$ 0.2         |
| 4.0  | 70.9 $\pm$ 1.1                       | 69.9 $\pm$ 0.3         |
| 5.0  | 68.1 $\pm$ 0.9                       | 63.1 $\pm$ 0.8         |
| 6.0  | 30.6 $\pm$ 1.0*                      | 29.5 $\pm$ 0.5*        |
| 7.0  | 30.8 $\pm$ 0.5*                      | 31.8 $\pm$ 0.3*        |
| 8.0  | 31.7 $\pm$ 1.2*                      | 32.7 $\pm$ 0.6*        |
| 9.0  | 38.2 $\pm$ 2.1*                      | 33.2 $\pm$ 0.3*        |
| 10.0 | 58.9 $\pm$ 0.1**                     | 55.9 $\pm$ 0.1**       |
| 11.0 | 71.8 $\pm$ 0.2                       | 70.8 $\pm$ 0.2         |
| 12.0 | 71.2 $\pm$ 0.9                       | 70.7 $\pm$ 0.3         |

Surface tension of the control (deionized water) was 72.2  $\pm$  0.6 mN/m,  
 Statistical analysis: \*p < 0.001, \*\* p < 0.05 with respect to control value.

**Table S7.** Effect of heating at 100 °C for different time interval on surface tension reduction property of crude and purified rhamnolipid biosurfactant produced by the *P. aeruginosa* strain NBTU-01. Values are mean  $\pm$  S.D. of three determinations.

| Duration of Heating at 100 °C<br>(min) | Surface tension<br>(mNm <sup>-1</sup> ) |                           |
|----------------------------------------|-----------------------------------------|---------------------------|
|                                        | Crude<br>rhamnolipid                    | Purified<br>dirhamnolipid |
| 5                                      | 31.5 $\pm$ 0.29*                        | 29.5 $\pm$ 0.22*          |
| 10                                     | 31.6 $\pm$ 0.46*                        | 29.7 $\pm$ 0.46*          |
| 20                                     | 31.7 $\pm$ 0.65*                        | 29.7 $\pm$ 0.65*          |
| 30                                     | 30.6. $\pm$ 1.0*                        | 29.8 $\pm$ 1.0*           |
| 60                                     | 31.7 $\pm$ 0.66*                        | 30.7 $\pm$ 0.66*          |
| 120                                    | 32.7 $\pm$ 0.22*                        | 31.7 $\pm$ 0.22*          |
| 240                                    | 32.2 $\pm$ 0.39*                        | 31.2 $\pm$ 0.39*          |
| 300                                    | 31.9 $\pm$ 0.69*                        | 30.9 $\pm$ 0.69*          |

Surface tension of the control (deionized water) was 72.2  $\pm$  0.6 mN/m,

Statistical analysis: \*p < 0.001 with respect to control value.
